# Supplementary material for: Induction of Cytoprotective Pathways Is Central to the Extension of Lifespan Conferred by Multiple Longevity Pathways
Source: PLoS Genet. 2012 Jul 19;8(7):e1002792. doi: 10.1371/journal.pgen.1002792 (PMC3400582; doi:10.1371/journal.pgen.1002792)
Supplement: Table S6 — Compilation of cytoprotective gene expression, lifespan and stress tolerance phenotypes. Twenty-nine genes required for cytoprotective gene induction were characterized for contributions to lifespan extension and stress tolerance. Those that disrupt cytoprotective gene induction, specifically reduce the lifespan of one or more long-lived mutants and are required for xenobiotic stress tolerance are of greatest interest. The most compelling intersections of these phenotypes are observed upon inactivation of phi-50, ima-3, elt-2, nekl-2, wnk-1, let-92, mdt-26, and let-70. In order to provide an overview of these data, we have compiled all results described throughout the body of this manuscript in a single table. (XLSX) [file pgen.1002792.s010.xlsx]

## Sheet: data compilation
		phsp-4::gfp		phsp-6::gfp		psod-3::gfp		pgst-4::gfp		phsp-16.2::gfp		psur-5::gfp		N2			isp-1; ctb-1				eat-2				daf-2				Paraquat		Sodium azide		Cadmium chloride		Antimycin		Water		Ethanol
		Fold decrease	p value	Fold decrease	p value	Fold decrease	p value	Fold decrease	p value	Fold decrease	p value	Fold decrease	p value	Mean Lifespan (days)	p value	∆ Lifespan	Mean Lifespan (days)	p value	Extension	∆ Extension	Mean Lifespan (days)	p value	Extension	∆ Extension	Mean Lifespan (days)	p value	Extension	∆ Extension	Lethality	p value	Lethality	p value	Lethality	p value	Lethality	p value	Lethality	p value	Lethality	p value
dcp-66	Deacetylase; NuRD complex	1.49863	0.109091	1.10947	0.295507	13.8599	4.44918e-17	1.43108	0.0846704	1.21681	0.181298	0.868359	0.0308524	12.65	0	-0.302646	13.45	0	0.0632411	-0.870957	17.51	0	0.38419	-0.137475	34.2	0.004	1.70356	0.505238	0.374886	0.495162	0.187238	0.429165	0.888889	0.0000*	0.128528	0.0892154	0	0.00879857	0	0.0399359
sptl-1	Sphingolipid synthesis	3.59224	1.48263e-10	3.9152	3.48579e-08	0.59497	0.00672746	2.76369	1.59454e-05	3.01625	1.54592e-06	1.44177	2.93995e-09	18.57	0.009	0.0237045	26.55	0.7403	0.429725	-0.123148	27.63	0.0213	0.487884	0.095323	37.87	0.1801	1.03931	-0.0816806	0.219325	0.0878598	0.117878	0.16507	0.309524	0.303933	0.291374	0.29029	0	0.00879857	0	0.0399359
gob-1	Trehalose synthesis	1.04396	0.423034	0.614439	0.016173	3.18504	7.43509e-10	0.93371	0.301487	1.03294	0.290043	0.895689	0.0246842	17.26	0.0024	-0.0485116	19.29	0	0.117613	-0.760011	19.37	0	0.122248	-0.725547	47.16	0	1.73233	0.53066	0.212044	0.007674	0.100475	0.208559	0.565532	0.285484	0.0833333	0.0473073	0	0.00879857	0.00980392	0.44651
ufd-1	Ubiquitin fusion degradation	0.786684	0.0521663	1.6535	0.0120346	0.967089	0.393092	1.35183	0.166122	0.990686	0.102256	0.844238	0.0810222	16.78	0	-0.0749724	18.33	0	0.0923719	-0.811516	19.18	0	0.143027	-0.678896	33.09	0	0.97199	-0.141164	0.13983	0.0318483	0.107692	0.139243	0.333333	0.0000*	0.0706845	0.00118007	0.0128205	0.1697	0	0.0399359
mdt-26	Transcription; mediator	3.22256	1.77314e-09	2.80822	1.94407e-06	0.817303	0.0986034	1.47555	0.00868652	1.51319	0.0606871	1.23245	2.66422e-06	15.68	0	-0.135612	22.52	0	0.436224	-0.109886	19.63	0	0.251913	-0.434442	29.43	0	0.876913	-0.225173	0.858558	0.00134201	0.365618	9.79238e-06	1	4.89573e-06	1	1.08125e-05	0	0.00879857	0	0.0399359
sdc-2	Transcriptional repression; dosage comp.	1.05717	0.349713	0.787383	0.0988859	2.50173	0.00157901	0.596382	0.0303025	1.08938	0.26702	0.933761	0.144201	15.51	0	-0.144983	18.64	0	0.201805	-0.588217	20.7	0	0.334623	-0.248755	35.71	0	1.30239	0.150768	0.235929	0.0400256	0.118853	0.118634	0.222222	0.0000*	0.191392	0.235666	0.016129	0.247452	0	0.0399359
F53F4.11	Uncharacterized	3.55116	4.13933e-09	1.5037	0.0765272	1.27255	0.12626	0.25782	0.02798	1.13861	0.214383	0.852515	0.0309727	19.42	0	0.0705623	27.47	0.1626	0.414521	-0.154172	29.39	0	0.513388	0.152582	38.66	0.3558	0.990731	-0.124605	0.0692428	5.67327e-05	0.0880491	0.055287	0.226415	0.0000*	0.177305	0.211203	0.0166667	0.259452	0	0.0399359
pas-3	20S proteasome, regulatory subunit	1.78731	0.0181632	2.70975	7.15553e-05	2.16378	0.00671598	0.621228	0.167895	0.990686	0.102256	1.05847	0.163607	16.83	0	-0.0722161	19.34	0	0.149138	-0.695684	19.47	0	0.156863	-0.647835	30.21	0	0.795009	-0.297542	0.133235	0.00190567	0.533213	2.74713e-05	0.460227	0.178708	0.183333	0.0121963	0	0.00879857	0	0.0399359
arf-3	ADP-ribosylation factor	0.718179	0.0142552	0.859485	0.215358	1.50954	0.00121858	1.89341	0.0325448	0.990686	0.102256	1.1291	0.00329618	18.11	0.8036	-0.0016538	20.81	0	0.149089	-0.695785	22.72	0	0.254555	-0.42851	34.46	0	0.902816	-0.202285	0.356178	0.344379	0.361939	0.0100005	0.392308	0.157737	0.052381	0.000768059	0	0.00879857	0	0.0399359
let-70	E2 ubiquitin conjugation enzyme	9.67088	4.51612e-13	31.5509	5.43465e-10	4.66202	3.8027e-15	2.86323	8.64645e-06	1.37918	0.0717061	1.30299	2.33409e-11	17.23	0	-0.0501654	19.08	0	0.107371	-0.78091	18.19	0	0.0557168	-0.874913	32.24	0	0.871155	-0.230261	0.285107	0.203063	0.296325	0.0309182	0.394465	0.179281	0.26879	0.0941937	0	0.00879857	0.0166667	0.348928
phi-50	Mevalonate synthesis	0.891699	0.235826	1.10958	0.222122	5.77668	8.89298e-16	4.308	0.00828093	1.61018	0.104073	1.19255	1.1915e-07	12.9	0	-0.288864	13.56	0	0.0511628	-0.895603	14.5	0	0.124031	-0.721544	16.39	0	0.270543	-0.760953	0.298663	0.212346	0.65271	0.00610641	0.96875	1.93206e-05	0.646236	0.0888925	0	0.00879857	0	0.0399359
kin-1	Serine/threonine protein kinase	0.920553	0.411061	0.822975	0.0720737	1.96092	0.00167157	0.839767	0.0664315	1.0043	0.406015	1.2572	3.29375e-05	13.33	0	-0.26516	17.08	0	0.28132	-0.425967	18.38	0	0.378845	-0.149475	36.4	0.0002	1.73068	0.529205	0.188934	0.0353199	0.520015	0.00170154	0.321429	0.430059	0.24359	0.186197	0	0.00879857	0.0166667	0.348928
Y50D7A.11	Uncharacterized	2.51457	5.26559e-06	1.46923	0.019003	0.656299	0.00494384	0.617695	0.00755441	0.990686	0.102256	1.162	0.00743792	19.04	0	0.0496141	27.82	0.3806	0.461134	-0.0590575	26.16	0.8859	0.37395	-0.160465	37.79	0.0771	0.984769	-0.129873	0.16674	0.0166252	0.320136	0.123161	0.397436	0.265359	0.130303	0.0430627	0	0.00879857	0	0.0399359
skr-1	Ubiquitin ligase complex component	1.06355	0.261742	0.825836	0.100509	1.09434	0.375643	1.49788	0.00701689	0.990686	0.102256	0.981635	0.322265	19.1	0	0.0529217	23.42	0	0.226178	-0.538485	25.12	0.0799	0.315183	-0.292398	38.09	0.147	0.994241	-0.121504	0.282267	0.157103	0.245751	0.0849567	0.309028	0.282866	0.135198	0.0126839	0	0.00879857	0.140625	0.259405
cpf-2	mRNA cleavage and polyA factor	1.1643	0.1105	2.70789	2.67833e-06	0.654627	0.000885998	0.877472	0.194533	0.990686	0.102256	1.1659	1.59481e-05	17.13	0	-0.0556781	21.6	0	0.260946	-0.467542	19.12	0	0.11617	-0.739192	30.91	0	0.804437	-0.289212	0.145096	0.0246612	0.390035	0.00214049	0.294118	0.421924	0.116397	0.00594014	0	0.00879857	0	0.0399359
ima-3	Importin alpha nuclear transport factor	3.77279	5.2727e-11	102.642	8.67096e-12	1.2064	0.0644728	0.495806	0.037156	0.990686	0.102256	1.13012	7.69613e-06	16.94	0	-0.0661521	18.47	0	0.0903188	-0.815705	18.1	0	0.068477	-0.846266	22.24	0	0.312869	-0.723554	0.116359	0.00723744	0.291493	0.0537334	0.305901	0.276936	0.0967852	0.0106052	0	0.00879857	0	0.0399359
cpsf-4	mRNA cleavage and polyA specificity	2.3326	3.27662e-07	3.88993	5.36126e-09	0.591031	0.0047214	0.731007	0.112405	0.990686	0.102256	1.16265	9.8001e-06	20.76	0	0.144432	26.89	0.9639	0.295279	-0.397484	26.27	0.9398	0.265414	-0.404132	39.09	0.8794	0.882948	-0.21984	0.147591	9.01794e-05	0.244709	0.169582	0.332729	0.459916	0.0519568	0.000825335	0	0.00879857	0	0.0399359
cpsf-2	mRNA cleavage and polyA specificity	3.63281	7.57631e-09	27.8557	6.42193e-08	3.00048	8.14569e-07	2.32039	0.032591	1.20507	0.221855	1.26329	6.70191e-07	18.85	0.002	0.03914	29.96	0	0.58939	0.202647	29.42	0	0.560743	0.258895	39.58	0.5526	1.09973	-0.0282909	0.161337	0.000260215	0.172151	0.47999	0.16636	0.00591971	0.128409	0.0196814	0	0.00879857	0	0.0399359
daf-16	Transcription factor; insulin signaling	0.879211	0.192427	1.25808	0.0866137	96.3193	6.04915e-17	0.79439	0.0501114	1.04263	0.282194	0.90803	0.0866091	12.52	0	-0.309813	13.95	0	0.114217	-0.76694	17.89	0	0.428914	-0.0370674	17.23	0	0.376198	-0.667597	0.582996	0.0241119	0.170981	0.49602	0.695661	0.160894	0.3125	0.352692	0	0.00879857	0	0.0399359
ire-1	Kinase; ER UPR	12.9506	2.82398e-13	1.04788	0.421015	0.658099	0.0104742	0.705676	0.0103444	0.995914	0.325024	0.885805	0.0837842	16.55	0	-0.0876516	23.5	0	0.41994	-0.143115	21.46	0	0.296677	-0.333946	38.15	0.6684	1.30514	0.153199	0.255702	0.0223266	0.217647	0.28552	0.249409	0.0782125	0.21992	0.0283612	0	0.00879857	0	0.0399359
F18F11.5	Serine/threonine protein kinase	2.58697	0.00111785	0.610738	0.0206409	0.884633	0.36221	2.43774	1.49995e-05	1.33362	0.0000*	1.34209	4.80939e-12	17.6	0.1644	-0.0297685	29.58	0.0001	0.680682	0.388928	26.93	0.0986	0.530114	0.190131	43.26	0	1.45795	0.288227	0.361136	0.387509	0.422715	0.00459041	0.407895	0.294107	0.842857	0.00235232	0.0192308	0.313439	0	0.0399359
wnk-1	Serine/threonine protein kinase	1.973	7.28468e-06	1.39776	0.0574081	0.944151	0.344866	1.23917	0.0467378	1.00917	0.355195	1.02202	0.198981	16.54	0	-0.0882029	19.64	0	0.187424	-0.617561	18.17	0	0.098549	-0.778753	24.44	0	0.47763	-0.577973	0.628968	0.00397992	0.363063	7.03407e-06	0.840476	0.000441954	0.178434	0.015546	0	0.00879857	0	0.0399359
skn-1	Transcription factor; stress, detox	1.2626	0.018486	0.943484	0.335934	1.15502	0.213111	2.16863	0.000971658	0.990686	0.102256	1.00982	0.429226	17.13	0	-0.0556781	25.91	0	0.512551	0.0458579	23.75	0	0.386457	-0.132386	39.3	0	1.29422	0.143554	0.221917	0.00555729	0.308294	0.177142	0.295	0.27385	0.14359	0.00487323	0	0.00879857	0	0.0399359
lin-40	Deacetylase; NuRD complex	1.11922	0.220956	1.27445	0.106321	17.2365	2.45186e-17	2.16784	4.11063e-05	1.27614	0.0553673	0.978643	0.414216	17.25	0.0006	-0.0490628	23.12	0	0.34029	-0.30564	25.64	0.4331	0.486377	0.09194	38.68	0.3286	1.24232	0.0976943	0.394351	0.36916	0.264354	0.186214	0.222527	0.0272978	0.23545	0.0838403	0.0128205	0.1697	0	0.0399359
rab-10	RAS GTPase; endocytosis	1.69121	7.37339e-05	2.56195	8.55597e-05	0.687312	0.00601911	1.76448	0.00182142	0.998857	0.460924	1.23489	9.91632e-10	18.26	0.6137	0.00661521	28.56	0.0624	0.564074	0.150991	26.08	0.754	0.428258	-0.0385385	39.61	0.2918	1.16922	0.0331073	0.255697	0.200192	0.192802	0.34804	0.288037	0.343609	0.0981191	0.00257913	0.0128205	0.1697	0	0.0399359
C06A8.2	Transcription; SNAPc	1.47184	0.0047861	4.48924	5.8294e-09	0.937029	0.380517	0.698002	0.112423	0.995304	0.29182	1.0323	0.242302	17.13	0	-0.0556781	22.38	0.4314	0.30648	-0.374629	21.76	0	0.270286	-0.393194	33.93	0.6056	0.980736	-0.133437	0.340548	0.288503	0.372518	0.0201697	0.52381	0.0000*	0.125	0.0571827	0	0.00879857	0	0.0399359
cul-1	Ubiquitin ligase complex component	1.42493	0.00373795	0.906265	0.290068	1.27731	0.13544	1.82431	0.000510747	1.06788	0.27158	1.07946	0.109644	17.97	0.3395	-0.00937155	24.87	0.0104	0.383973	-0.216504	22.06	0	0.227602	-0.489023	40.79	0.1198	1.26989	0.12206	0.247189	0.0561223	0.289767	0.140428	0.442222	0.0385753	0.153333	0.085326	0	0.00879857	0	0.0399359
elt-2	Transcription factor; intestinal	7.53011	1.41724e-11	-21.7134	8.17e-12	3.19527	7.69221e-06	5.82254	1.13768e-06	2.11487	0.0255338	1.40378	6.33105e-05	14.38	0	-0.207277	16.68	0	0.159944	-0.673634	15.42	0	0.0723227	-0.837632	25.25	0	0.755911	-0.332088	0.571804	0.061354	0.321358	0.025543	0.731685	0.0279754	0.655671	0.0190481	0.0172414	0.272031	0.0142857	0.370381
hda-1	Histone deacetylase	0.543792	3.24623e-05	0.531507	0.000370366	5.94482	2.11711e-14	0.950297	0.374902	1.21209	0.093845	1.20078	0.00024183	16.17	0	-0.1086	20.06	0	0.240569	-0.50912	24.22	0.0002	0.497835	0.117665	37.79	0.0899	1.33704	0.181392	0.170348	0.000706021	0.172243	0.488878	0.172414	0.0000*	0.0438165	0.000645093	0	0.00879857	0.0227273	0.317657
dpy-22	Transcription; mediator	0.78838	0.122879	1.17174	0.263979	1.6451	9.65106e-06	1.28151	0.100297	0.994937	0.271729	1.11602	1.94007e-05	17.56	0.111	-0.0319735	24.6	0.019	0.400911	-0.181943	25.91	0.4739	0.475513	0.0675492	41.93	0.0062	1.38781	0.226251	0.489589	0.0096398	0.343546	0.0414008	0.409317	0.31114	0.33631	0.356444	0.00961538	0.094437	0	0.0399359
let-92	Serine/threonine protein phosphatase	0.986605	0.458453	3.85534	5.55316e-06	3.21878	5.83318e-05	25.0615	6.67413e-08	1.16627	0.0596412	1.37753	1.76574e-12	15.67	0	-0.136163	19.03	0	0.214422	-0.562472	18.79	0	0.199107	-0.552996	32.38	0	1.06637	-0.0577725	0.139723	0.000671705	0.447987	0.0832106	0.113248	0.00176853	0.909868	2.12588e-05	0.0172414	0.272031	0	0.0399359
nekl-2	Serine/threonine protein kinase	0.838825	0.0227266	1.36858	0.075225	1.03606	0.408709	3.26655	0.0278508	1.26402	0.103157	1.07023	0.0146809	13.7	0	-0.244763	17.48	0	0.275912	-0.437002	15.71	0	0.146715	-0.670617	33.54	0	1.44818	0.279586	1	4.09968e-11	0.90798	1.79441e-06	1	4.89573e-06	0.978261	8.5997e-06	0.0555556	0.372868	0	0.0399359
wt (L4440)		1		1		1		1		1		1		18.14		0	27.03		0.490077	0	26.22		0.445424	0	38.67		1.13175	0	0.376405		0.170465		0.338624		0.366313		0.0320827		0.00810465
*insufficient replicates
